# Supplementary material for: Silver nanocube coupling with a nanoporous silver film for dual-molecule recognition based ultrasensitive SERS detection of dopamine
Source: Royal Society of Chemistry journal article supplement (doi:10.1039/d0an00177e), 2020-01-01
Supplement: d0an00177e1.pdf [file d0an00177e1.pdf]

## Supporting Information

### Silver nanocube coupling with nanoporous silver film for dual-molecule recognition based ultrasensitive SERS detection of dopamine

Dechan Lu<sup>1</sup>, Min Fan<sup>1</sup>, Rongyuan Cai<sup>1</sup>, Zufang Huang<sup>2</sup>, Ruiyun You<sup>1\*</sup>, Luqiang Huang<sup>3</sup>, Shangyuan Feng<sup>2</sup> and Yudong Lu<sup>1\*</sup>.

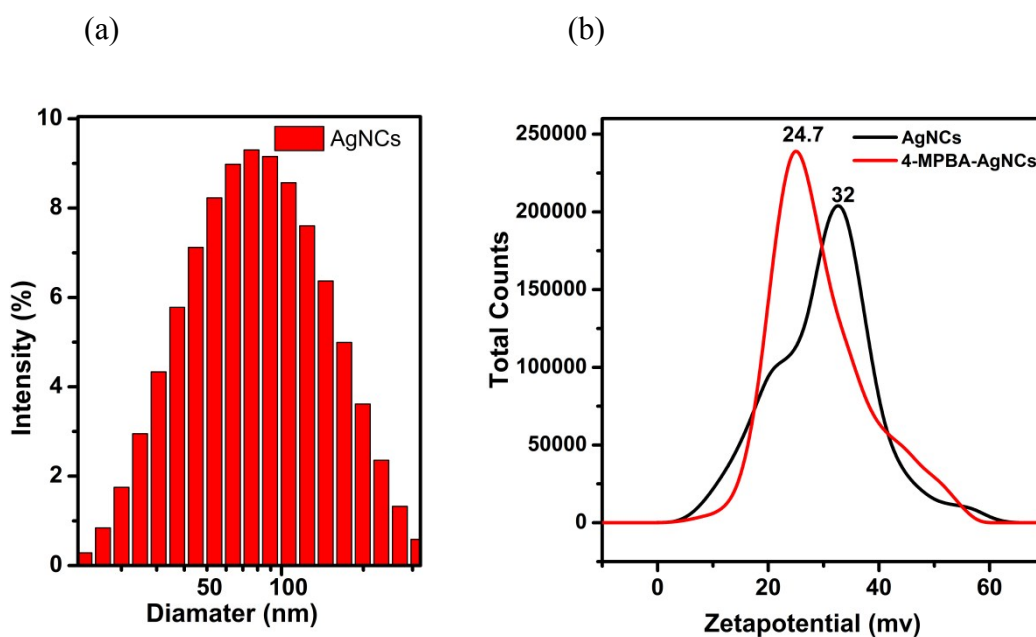

Fig.S1.(a)DLS analysis of the AgNCs, (b)Zeta potential analysis of AgNCs before and after functionalization with 4-MPBA.

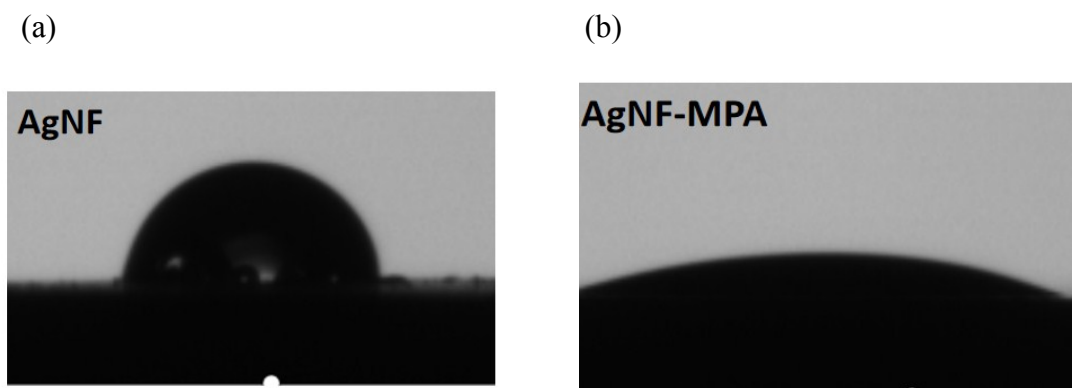

Fig.S2.The contact angle measurements for the AgNF(a) and AgNF modified with MPA(b), respectively.

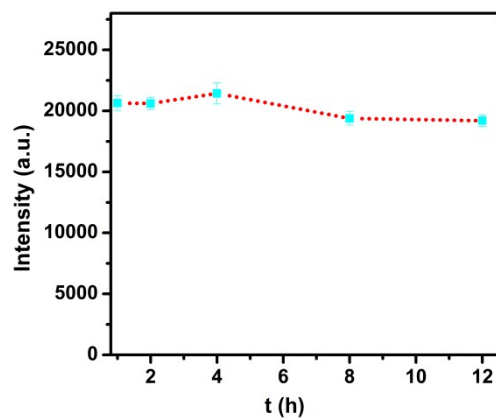

Fig.S3. The stability of DA sensor, variation of the SERS intensity of the 1074  $\text{cm}^{-1}$  band as a function of time.
